# Supplementary material for: Deep learning to estimate gestational age from blind ultrasound sweeps of the gravid abdomen
Source: bioRxiv or medRxiv preprint supplement (doi:10.1101/2021.11.22.21265452), 2021-11-24
Supplement: Supplementary file [file media-1.pdf]

## Appendix

### Section 1: Technical Methods for the Deep Learning Model

This section is redacted until the manuscript is accepted for publication

### Section 2: Additional Statistical Methods

#### Calculation of Standard Errors (SE) for Root Mean Square Error (RMSE)

Let  $U_i, i = 1, \dots, n$  be  $n$  independent errors.

Denote RMSE as  $\hat{\sigma}_n$ , where  $\hat{\sigma}_n^2 = n^{-1} \sum_{i=1}^n U_i^2$ .

Define

$$\hat{\tau}_n^2 = \frac{\sum_{i=1}^n [U_i^4 - \hat{\sigma}_n^4]}{4n\hat{\sigma}_n^2}$$

Then the SE for the RMSE is  $\hat{\tau}_n/\sqrt{n}$  based on the delta method.

#### Calculation of Standard Errors (SE) and Confidence Interval for Difference in Root Mean Square Error (RMSE)

Let  $(X_1, Y_1), \dots, (X_n, Y_n)$  be the errors for the model ( $X$ ) and for the expert ( $Y$ ). Let  $\hat{\sigma}_n^2 = P_n X^2$  and  $\hat{\tau}_n^2 = P_n Y^2$ , where  $P_n$  is the empirical process (i.e.,  $P_n f(X) = n^{-1} \sum_{i=1}^n f(X_i)$ ). Also, denote  $\sigma_0^2 = P X^2$  and  $\tau_0^2 = P Y^2$ , where  $P$  is the expectation.

We can use the Taylor expansion, and the fact that the derivative of  $\sqrt{u}$  is  $u^{-1/2}/2$ , to obtain that  $\sqrt{n}(\sqrt{\hat{\sigma}_n^2} - \sigma_0) = \sqrt{n}(\hat{\sigma}_n^2 - \sigma_0^2)/(2\sigma_0) + o_p(1)$ . Similarly, we can verify that  $\sqrt{n}(\sqrt{\hat{\tau}_n^2} - \tau_0) = \sqrt{n}(\hat{\tau}_n^2 - \tau_0^2)/(2\tau_0) + o_p(1)$ . Now, letting  $IF(X, Y) = (X^2 - \sigma_0^2)/(2\sigma_0) - (Y^2 - \tau_0^2)/(2\tau_0)$ , we have that  $D_n = \sqrt{\hat{\sigma}_n^2} - \sqrt{\hat{\tau}_n^2} - \sigma_0 + \tau_0 = n^{-1/2} P_n IF(X, Y) + o_p(n^{-1/2})$ .

This means that the true variance of  $D_n$  equals  $n^{-1} P(IF(X, Y))^2 + o(1)$ .

Let  $\widehat{IF}(X, Y) = (X^2 - \hat{\sigma}_n^2)/(2\hat{\sigma}_n) - (Y^2 - \hat{\tau}_n^2)/(2\hat{\tau}_n)$ .

$n^{-1} \sum_{i=1}^n [\widehat{IF}(X_i, Y_i)]^2$  is consistent for  $P[IF(X, Y)]^2$ , and thus we can consistently estimate the the SE of the difference between the RMSEs with

$$n^{-1/2} \sqrt{n^{-1} \sum_{i=1}^n [\widehat{IF}(X_i, Y_i)]^2}$$

## Section 3: Supplementary Figures

Figure S1: DL model architecture

This Figure is redacted until the manuscript is accepted for publication

Figure S2: Gestational age distribution of the training and testing sets

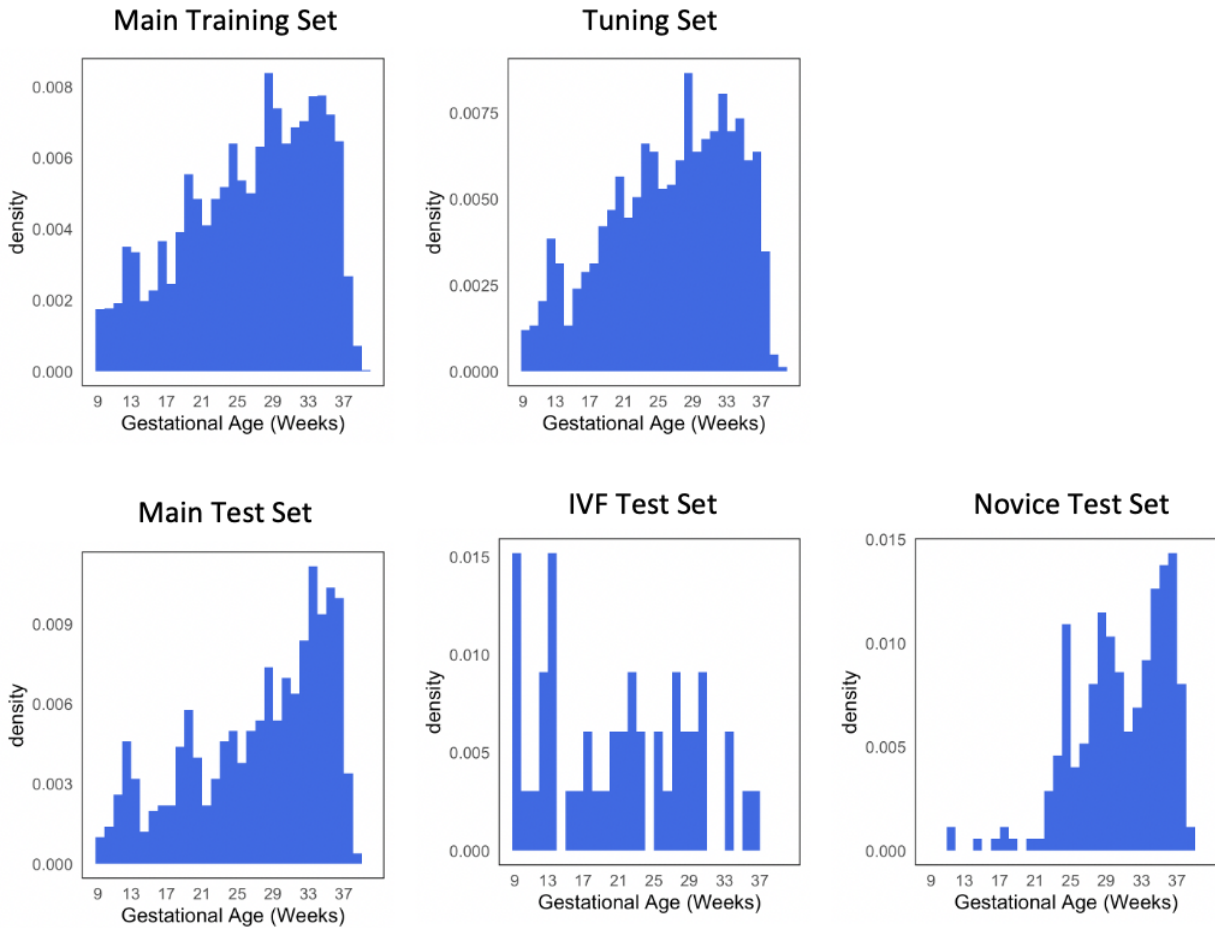

**Figure S3: Overview of FAMLI protocol clinical data collection**

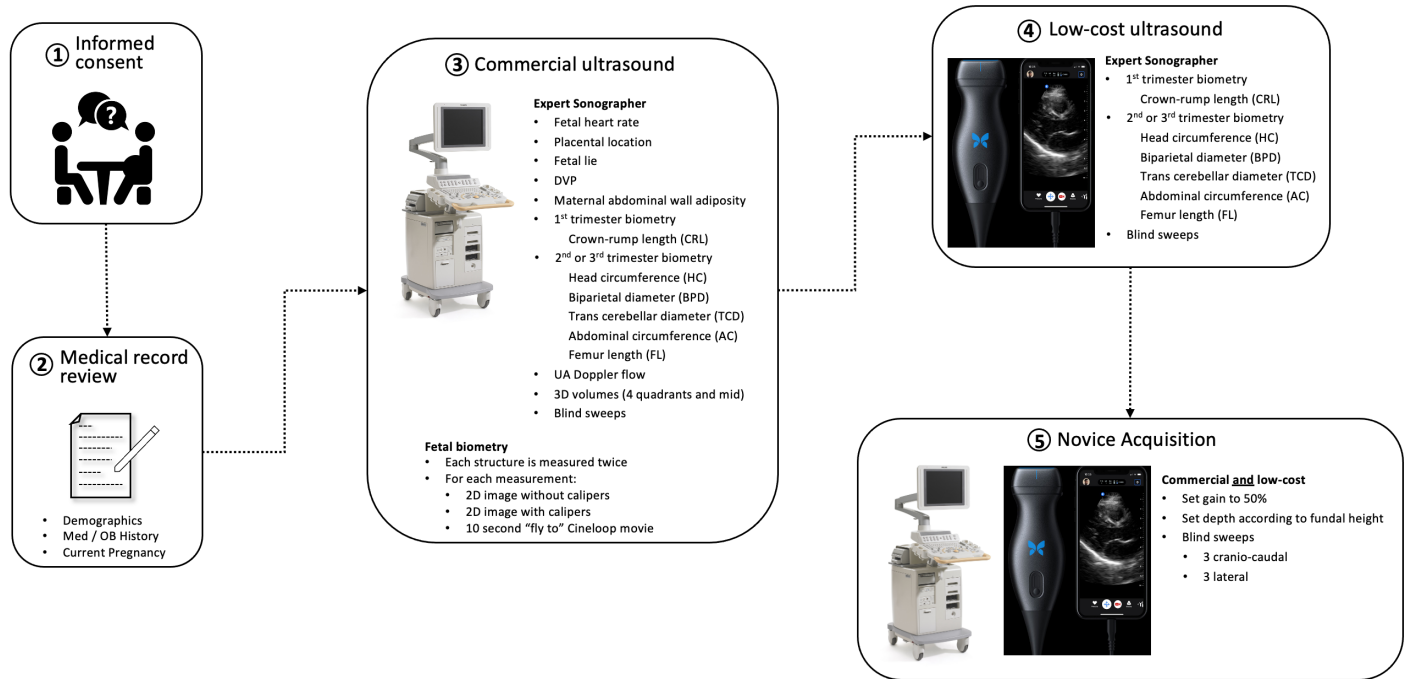

Graphical representation of a participant visit and ultrasound data collection in the FAMLI Study. Step 5 (novice acquisition) began in June 2020 at the Zambia sites only.

## Section 4: Supplemental Tables

**Table S1:** Ultrasound devices used

| <b>Ultrasound Make and Model</b> | <b>Training Set<br/>N=4,770</b> | <b>Tuning Set<br/>N=1,188</b> | <b>Main Test Set<br/>N=716</b> | <b>IVF Test Set<br/>N=47</b> | <b>Novice Test Set<br/>N=249</b> |
|----------------------------------|---------------------------------|-------------------------------|--------------------------------|------------------------------|----------------------------------|
| Butterfly iQ                     | 3833                            | 941                           | 0                              | 0                            | 249                              |
| GE LOGIQ C3 Premium              | 83                              | 17                            | 0                              | 0                            | 0                                |
| GE LOGIQ e                       | 136                             | 35                            | 0                              | 0                            | 0                                |
| Sonosite MTurbo                  | 1955                            | 457                           | 219                            | 0                            | 0                                |
| GE Voluson E8                    | 801                             | 236                           | 188                            | 17                           | 0                                |
| GE Voluson S6                    | 1712                            | 417                           | 299                            | 30                           | 0                                |

Each participant study visit involves data collection with both a commercial and low-cost device. We limited the test sets to a single device (Main test set and IVF test set has commercial device only; Novice test set has low-cost device only). We did not impose this limitation on the training and tuning sets (i.e., during training a single participant study could contribute blind sweep cine-loops from two devices.) Butterfly = Butterfly Network, Inc Guilford, CT, USA; GE = General Electric Healthcare, Zipf, Austria; Sonosite = SonoSite Inc, Bothell, WA, USA.

**Table S2:** Gestational age estimation of deep learning model compared to expert sonographer – sensitivity analysis

|                                               | Main Test Set (n = 1278) <sup>a</sup> |            |                        | IVF Test Set (n = 79) <sup>b</sup> |            |                        |
|-----------------------------------------------|---------------------------------------|------------|------------------------|------------------------------------|------------|------------------------|
|                                               | Model                                 | Biometry   | Difference<br>(95% CI) | Model                              | Biometry   | Difference<br>(95% CI) |
| Mean Absolute Error (SE), days                | 3.9 (0.09)                            | 4.7 (0.11) | -0.8 (-1.1, -0.6)      | 3.0 (0.26)                         | 3.6 (0.38) | -0.6 (-1.3, 0.1)       |
| Root Mean Square Error, days                  | 5.1 (0.13)                            | 6.2 (0.15) | -1.1 (-1.4, -0.8)      | 3.8 (0.32)                         | 4.9 (0.47) | -1.1 (-2.0, -0.2)      |
| 1 <sup>st</sup> trimester <sup>c</sup>        |                                       |            |                        |                                    |            |                        |
| Mean Absolute Error (SE), days                | 2.3 (0.17)                            | 2.2 (0.18) | 0.1 (-0.4, 0.5)        | 2.2 (0.34)                         | 2.4 (0.43) | -                      |
| 2 <sup>nd</sup> trimester                     |                                       |            |                        |                                    |            |                        |
| Mean Absolute Error (SE), days                | 3.1 (0.11)                            | 3.5 (0.13) | -0.4 (-0.7, -0.2)      | 2.5 (0.30)                         | 3.0 (0.54) | -                      |
| 3 <sup>rd</sup> trimester                     |                                       |            |                        |                                    |            |                        |
| Mean Absolute Error (SE), days                | 4.8 (0.15)                            | 6.1 (0.18) | -1.3 (-1.7, -0.9)      | 4.2 (0.58)                         | 5.1 (0.76) | -                      |
| Absolute Error < 7 days (SE), %               | 85.4 (1.0)                            | 77.3 (1.2) | 8.1 (5.6, 10.7)        | 92.4 (3.0)                         | 84.8 (4.0) | -                      |
| Absolute Error < 14 days (SE), %              | 98.7 (0.3)                            | 96.5 (0.5) | 2.3 (1.1, 3.4)         | 100.0                              | 100.0      | -                      |
| North Carolina Mean Absolute Error (SE), days | 3.6 (0.12)                            | 4.1 (0.14) | -0.5 (-0.7, -0.2)      | -                                  | -          | -                      |
| Zambia Mean Absolute Error (SE), days         | 4.2 (0.15)                            | 5.5 (0.18) | -1.3 (-1.7, -0.9)      | -                                  | -          | -                      |

Our primary analyses limited test sets to a single ultrasound study per participant. This sensitivity analysis allows participants to contribute more than one study to their test set. <sup>a</sup> The **main test set** comprises a 30% random sample of participants who are dated by a prior ultrasound and who are not included in the IVF or novice test sets; participants enrolled in either North Carolina or Zambia; blind sweeps and fetal biometry were collected by a sonographer on a commercial ultrasound machine. <sup>b</sup> The **IVF test set** comprises all studies conducted in women who conceived by *in vitro* fertilization; all participants were enrolled in North Carolina; blind sweeps and fetal biometry were collected by a sonographer on a commercial ultrasound machine. <sup>c</sup> Trimesters defined as ≤97 days, 98 – 195 days, ≥196 days. SE=standard error; CI=confidence interval; LMP=last menstrual period

**Table S3:** Gestational age estimation of deep learning model compared to expert sonographer – sensitivity analysis

|                                                                                                | Novice Test Set (n = 330) <sup>a</sup> |            |                  |                                           |                                                     |
|------------------------------------------------------------------------------------------------|----------------------------------------|------------|------------------|-------------------------------------------|-----------------------------------------------------|
|                                                                                                | Model                                  | Biometry   | LMP <sup>b</sup> | Difference<br>Model vs Expert<br>(95% CI) | Difference<br>Model vs LMP <sup>b</sup><br>(95% CI) |
| Mean Absolute Error (SE), days                                                                 | 5.0 (0.27)                             | 5.5 (0.26) | 17.9 (1.06)      | -0.5 (-1.1, 0.1)                          | -13.1 (-15.2, -11.0)                                |
| Root Mean Square Error, days                                                                   | 7.0 (0.41)                             | 7.3 (0.49) | 25.6 (1.55)      | -0.3 (-1.3, 0.8)                          | -18.8 (-21.9, -15.6)                                |
| 1 <sup>st</sup> and 2 <sup>nd</sup> trimester <sup>c,d</sup><br>Mean Absolute Error (SE), days | 3.9 (0.37)                             | 3.9 (0.33) | 16.5 (1.90)      | -0.0 (-0.7, 0.7)                          | -13.1 (-17.0, -9.2)                                 |
| 3 <sup>rd</sup> trimester<br>Mean Absolute Error (SE), days                                    | 5.4 (0.34)                             | 6.1 (0.33) | 18.4 (1.28)      | -0.7 (-1.5, 0.1)                          | -13.1 (-15.6, -10.6)                                |
| Absolute Error < 7 days (SE), %                                                                | 74.5 (2.4)                             | 70.9 (2.5) | 39.5 (2.8)       | 3.6 (-2.2, 9.5)                           | 37.2 (30.1, 44.2)                                   |
| Absolute Error < 14 days (SE), %                                                               | 93.9 (1.3)                             | 94.2 (1.3) | 54.7 (2.9)       | -0.3 (-3.7, 3.1)                          | 39.9 (34.0, 45.7)                                   |

Our primary analyses limited test sets to a single ultrasound study per participant. This sensitivity analysis allows participants to contribute more than one study to their test set. <sup>a</sup> The **novice test set** comprises all participants who contributed at least one set of blind sweeps performed by a novice user on a low-cost, battery-powered device; all participants enrolled in Zambia; expert biometry was performed by a sonographer on a commercial machine. <sup>b</sup> 22 participants who could not recall their last menstrual period are excluded. <sup>c</sup> Trimesters defined as ≤97 days, 98 – 195 days, ≥196 days. <sup>d</sup> Only 2 studies in the 1<sup>st</sup> trimester; 62 studies in the 2<sup>nd</sup> trimester. SE=standard error; CI=confidence interval; LMP=last menstrual period.
